# Supplementary material for: Enhanced cholera surveillance to improve vaccination campaign efficiency
Source: PubMed Central journal article supplement (PMC11031394; doi:10.1038/s41591-024-02852-8), 2024-03-05
Supplement: 41591_2024_2852_MOESM1_ESM.pdf [file 41591_2024_2852_MOESM1_ESM.pdf]

## Reporting Summary

Nature Portfolio wishes to improve the reproducibility of the work that we publish. This form provides structure for consistency and transparency in reporting. For further information on Nature Portfolio policies, see our [Editorial Policies](#) and the [Editorial Policy Checklist](#).

### Statistics

For all statistical analyses, confirm that the following items are present in the figure legend, table legend, main text, or Methods section.

n/a Confirmed

- The exact sample size ( $n$ ) for each experimental group/condition, given as a discrete number and unit of measurement
- A statement on whether measurements were taken from distinct samples or whether the same sample was measured repeatedly
- The statistical test(s) used AND whether they are one- or two-sided  
*Only common tests should be described solely by name; describe more complex techniques in the Methods section.*
- A description of all covariates tested
- A description of any assumptions or corrections, such as tests of normality and adjustment for multiple comparisons
- A full description of the statistical parameters including central tendency (e.g. means) or other basic estimates (e.g. regression coefficient) AND variation (e.g. standard deviation) or associated estimates of uncertainty (e.g. confidence intervals)
- For null hypothesis testing, the test statistic (e.g.  $F$ ,  $t$ ,  $r$ ) with confidence intervals, effect sizes, degrees of freedom and  $P$  value noted  
*Give  $P$  values as exact values whenever suitable.*
- For Bayesian analysis, information on the choice of priors and Markov chain Monte Carlo settings
- For hierarchical and complex designs, identification of the appropriate level for tests and full reporting of outcomes
- Estimates of effect sizes (e.g. Cohen's  $d$ , Pearson's  $r$ ), indicating how they were calculated

*Our web collection on [statistics for biologists](#) contains articles on many of the points above.*

### Software and code

Policy information about [availability of computer code](#)

Data collection Model inputs and assumptions are available at [https://github.com/HopkinsIDD/gavi\\_vimc\\_cholera](https://github.com/HopkinsIDD/gavi_vimc_cholera)

Data analysis Modeling was conducted in R version 4.0.3 and all code is publicly available at [https://github.com/HopkinsIDD/gavi\\_vimc\\_cholera](https://github.com/HopkinsIDD/gavi_vimc_cholera)

For manuscripts utilizing custom algorithms or software that are central to the research but not yet described in published literature, software must be made available to editors and reviewers. We strongly encourage code deposition in a community repository (e.g. GitHub). See the Nature Portfolio [guidelines for submitting code & software](#) for further information.

### Data

Policy information about [availability of data](#)

All manuscripts must include a [data availability statement](#). This statement should provide the following information, where applicable:

- Accession codes, unique identifiers, or web links for publicly available datasets
- A description of any restrictions on data availability
- For clinical datasets or third party data, please ensure that the statement adheres to our [policy](#)

Summary model outputs related to vaccine targeting, public health impact, and cost-effectiveness for each scenario are available on figshare at <https://doi.org/10.6084/m9.figshare.25037177>. Sub-national shapefiles are available from the Global Administrative area database (GADM), which we accessed from the R package GADMtools (version 3.9.1).

## Human research participants

Policy information about [studies involving human research participants and Sex and Gender in Research](#).

|                             |                                             |
|-----------------------------|---------------------------------------------|
| Reporting on sex and gender | <input type="text" value="Not applicable"/> |
| Population characteristics  | <input type="text" value="Not applicable"/> |
| Recruitment                 | <input type="text" value="Not applicable"/> |
| Ethics oversight            | <input type="text" value="Not applicable"/> |

Note that full information on the approval of the study protocol must also be provided in the manuscript.

## Field-specific reporting

Please select the one below that is the best fit for your research. If you are not sure, read the appropriate sections before making your selection.

Life sciences       Behavioural & social sciences       Ecological, evolutionary & environmental sciences

For a reference copy of the document with all sections, see [nature.com/documents/nr-reporting-summary-flat.pdf](https://nature.com/documents/nr-reporting-summary-flat.pdf)

## Life sciences study design

All studies must disclose on these points even when the disclosure is negative.

|                 |                                                                                                                                                                                                                                                                                                                                                                                                                                                                                                                                                                                                                      |
|-----------------|----------------------------------------------------------------------------------------------------------------------------------------------------------------------------------------------------------------------------------------------------------------------------------------------------------------------------------------------------------------------------------------------------------------------------------------------------------------------------------------------------------------------------------------------------------------------------------------------------------------------|
| Sample size     | <input 200="" and="" annual="" are="" capture="" cholera="" chose="" computationally="" distribution="" each="" estimate="" explore="" for="" in="" incidence="" large="" mean="" model,="" modeled="" modeling="" of="" only="" our="" parameter="" perform="" positivity="" rate="" rate.="" remaining="" samples="" samples"="" scenario="" simulations="" since="" sources="" space="" stochastic="" study.="" sufficiently="" the="" there="" this="" thought="" to="" tractable."="" two="" type="text" value="No sample size calculation was performed. There are no " variability="" was="" we="" while=""/> |
| Data exclusions | <input type="text" value="No data were excluded from the analysis."/>                                                                                                                                                                                                                                                                                                                                                                                                                                                                                                                                                |
| Replication     | <input type="text" value="200 stochastic simulations were performed for each modeling scenario. Our reported results represent summary statistics across 200 stochastic simulations. Here, we are not looking for results to be replicated across different simulations, but in reporting the summary statistics across many simulations we are trying to understand trends that hold true across a distribution of model parameters."/>                                                                                                                                                                             |
| Randomization   | <input type="text" value="This is not relevant to our modeling study. The study uses model assumptions and model simulation to test hypotheses. We did not aim to test the effectiveness of an intervention in different study populations using real-world data."/>                                                                                                                                                                                                                                                                                                                                                 |
| Blinding        | <input type="text" value="This is not relevant to our modeling study. There were no patients or intervention arms in our modeling study so blinding is not relevant."/>                                                                                                                                                                                                                                                                                                                                                                                                                                              |

## Reporting for specific materials, systems and methods

We require information from authors about some types of materials, experimental systems and methods used in many studies. Here, indicate whether each material, system or method listed is relevant to your study. If you are not sure if a list item applies to your research, read the appropriate section before selecting a response.

### Materials & experimental systems

|                                     |                                                        |
|-------------------------------------|--------------------------------------------------------|
| n/a                                 | <input type="checkbox"/> Involved in the study         |
| <input checked="" type="checkbox"/> | <input type="checkbox"/> Antibodies                    |
| <input checked="" type="checkbox"/> | <input type="checkbox"/> Eukaryotic cell lines         |
| <input checked="" type="checkbox"/> | <input type="checkbox"/> Palaeontology and archaeology |
| <input checked="" type="checkbox"/> | <input type="checkbox"/> Animals and other organisms   |
| <input checked="" type="checkbox"/> | <input type="checkbox"/> Clinical data                 |
| <input checked="" type="checkbox"/> | <input type="checkbox"/> Dual use research of concern  |

### Methods

|                                     |                                                 |
|-------------------------------------|-------------------------------------------------|
| n/a                                 | <input type="checkbox"/> Involved in the study  |
| <input checked="" type="checkbox"/> | <input type="checkbox"/> ChIP-seq               |
| <input checked="" type="checkbox"/> | <input type="checkbox"/> Flow cytometry         |
| <input checked="" type="checkbox"/> | <input type="checkbox"/> MRI-based neuroimaging |
